# Supplementary material for: The Behavior of Some Bacterial Strains Isolated from Fallow Deer Compared to Antimicrobial Substances in Western Romania
Source: MDPI journal article supplement (doi:10.3390/antibiotics12040743), 2023-04-12
Supplement: s1 [file s1]

## Supplementary Material

**Table S1.** Antimicrobial substances used for testing Gram-negative and Gram-positive species

| Antimicrobial substances used for testing Gram-negative species |      |                          |              |             |                                         |  |
|-----------------------------------------------------------------|------|--------------------------|--------------|-------------|-----------------------------------------|--|
| Antimicrobial                                                   | Code | Concentration<br>(µg/ml) | Limits (≤ ≥) |             | FDA directions for use                  |  |
| Ampicillin                                                      | AMP  | 4, 8, 32                 | 2            | 32          | CSAGNB**                                |  |
| Amoxicillin/Clavulanic acid                                     | AMC  | 4/2, 16/8, 32/16         | 2/1          | 32/16       | CSAGNB**                                |  |
| Cefalexin                                                       | CN   | 8, 32, 64                | 4            | 64          |                                         |  |
| Cephalothin                                                     | CF   | 2, 8, 32                 | 2            | 64          | CSAGNB**                                |  |
| Cefquinone                                                      | CEQ  | 0.5, 1.5, 4              | 0.5          | 8           | N/A**                                   |  |
| Cefoperazone                                                    | CFP  | 4, 8, 32                 | 4            | 64          | N/A**                                   |  |
| Ceftiofur                                                       | CFT  | 1, 2                     | 1            | 8           | N/A**                                   |  |
| Imipenem                                                        | IPM  | 1, 2, 6, 12              | 0.25         | 16          | <i>Enterobacter spp., E. coli</i>       |  |
| Gentamicin                                                      | GM   | 4, 16, 32                | 1            | 16          | CSAGNB**                                |  |
| Amikacin                                                        | AN   | 8, 16, 64                | 2            | 64          | CSAGNB**                                |  |
| Neomycin                                                        | N    | 8, 16, 64                | 2            | 64          | N/A**                                   |  |
| Flumequine                                                      | UB   | 2, 4, 8                  | 1            | 32          | N/A**                                   |  |
| Enrofloxacin                                                    | ENR  | 0.25, 1, 4               | 0.12         | 4           | N/A**                                   |  |
| Marbofloxacin                                                   | MRB  | 1, 2                     | 0.5          | 4           | N/A**                                   |  |
| Tetracycline                                                    | TE   | 2, 4, 8                  | 1            | 16          | CSAGNB**                                |  |
| Nitrofurantoin                                                  | FT   | 16, 32, 64               | 16           | 512         | CSAGNB**                                |  |
| Trimetho/ Sulfamethoxaxa                                        | SXT  | 1/19, 4/76, 16/304       | 20(1/19)     | 320(16/304) | <i>Enterobacter spp., Eco (+ETEC)**</i> |  |
| Antimicrobial substances used for testing Gram-positive species |      |                          |              |             |                                         |  |
| Antimicrobial                                                   | Code | Concentration<br>(µg/ml) | Limits (≤ ≥) |             | FDA directions for use                  |  |
| Amikacin                                                        | AN   | 16, 32, 64               | 2            | 64          | N/A**                                   |  |
| Gentamicin                                                      | GM   | 8, 16, 64                | 0.5          | 16          | <i>Staphylococcus spp.</i>              |  |
| Kanamycin                                                       | K    | 32, 64, 128              | 4            | 64          | N/A**                                   |  |
| Neomycin                                                        | N    | 16, 32, 64               | 2            | 32          | N/A**                                   |  |
| Enrofloxacin                                                    | ENR  | 1, 2                     | 0.5          | 4           | N/A**                                   |  |
| Erythromycin                                                    | E    | 0.25, 0.5, 2             | 0.25         | 8           | <i>Staphylococcus spp.</i>              |  |
| Tilmicosin                                                      | TIL  | 0.5, 1, 4                | 0.25         | 4           | N/A**                                   |  |
| Tylosin                                                         | TI   | 2, 8, 32                 | 1            | 32          | N/A**                                   |  |
| Clindamycin                                                     | CM   | 0.06, 0.25, 1            | 0.125        | 4           | MSSA**, MSSE**                          |  |
| Tetracycline                                                    | TE   | 0.5, 1, 2                | 1            | 16          | <i>Staphylococcus spp.,</i>             |  |
| Florfenicol                                                     | FFC  | 2, 4, 16                 | 4            | 32          | N/A**                                   |  |
| Trimetho/Sulfamethoxa                                           | SXT  | 8/152, 16/304, 32/608    | 10(0.5/9.5)  | 320(16/304) | N/A**                                   |  |

**Legend:** FDA = Food and Drug Administration; \*\*CSAGNB = clinical significance aerobic Gram-negative bacilli; \*\*N/A = No specific FDA indications are recommended for use. \*\*Eco (+ETEC) = *E. coli* (including sensitive enterotoxigenic strains involved in traveler's diarrhea); NEG = Negative; POS = Positive; \*\*MSSA = Methicillin-susceptible *S. aureus*; \*\*MSSE = Methicillin-susceptible *S. epidermidis*.
